# Supplementary material for: Higher Accumulation of Visceral Adipose Tissue Is an Independent Risk Factor for Hepatocellular Carcinoma among Viral Hepatitis Patients with Non-Cirrhotic Livers
Source: MDPI journal article supplement (doi:10.3390/cancers13235980), 2021-11-28
Supplement: s1 [file s1]

# Supplementary Materials: Higher Accumulation of Visceral Adipose Tissue is an Independent Risk Factor for Hepatocellular Carcinoma among Viral Hepatitis Patients with Non-Cirrhotic Livers

Kenji Imai, Koji Takai, Takao Miwa, Toshihide Maeda, Tatsunori Hanai, Yohei Shirakami, Atsushi Suetsugu and Masahito Shimizu

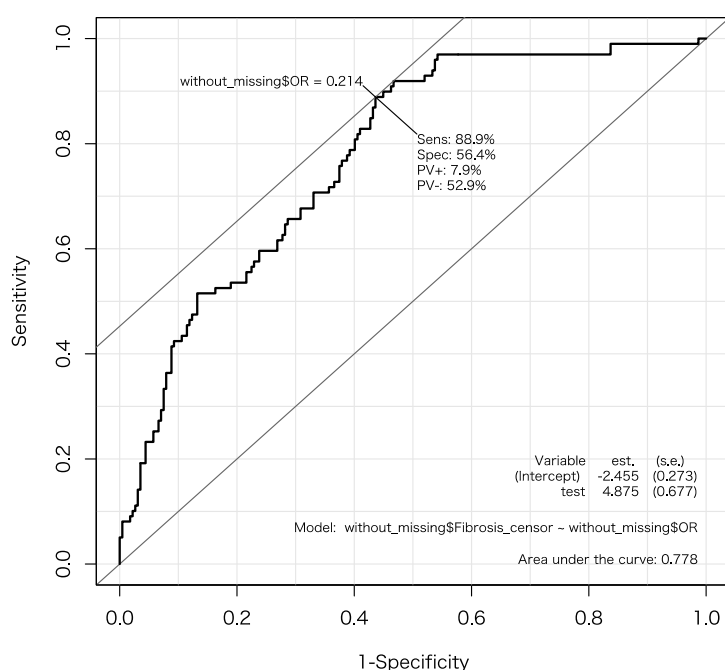

**Figure S1.** The receiver operating characteristic curve in evaluating the optimal cut-off value of the odds ratio of HCC in a non-cirrhotic liver.

**Table S1.** The details of the parameters used in the predictive formula for the odds ratio of HCC in a non-cirrhotic liver.

| Valuabels                               | Estimated Parameter | Standardized Error | <i>p</i> Value |
|-----------------------------------------|---------------------|--------------------|----------------|
| Intercept                               | −0.68               | 1.31               | 0.603          |
| Age (years)                             | −0.03               | 0.02               | 0.033          |
| Sex (male vs. female)                   | 1.15                | 0.36               | 0.001          |
| VATI (cm <sup>2</sup> /m <sup>2</sup> ) | 0.01                | 0.01               | 0.038          |
| HbA1c (%)                               | 0.26                | 0.13               | 0.039          |
| HTN (yes vs. no)                        | 0.72                | 0.29               | 0.014          |
| Etiology (HBV vs. HCV)                  | −1.39               | 0.35               | <0.001         |

HCC, hepatocellular carcinoma; VATI, visceral adipose tissue index; HbA1c, hemoglobin A1c; HTN, hypertension; HBV, hepatitis B virus; HCV, hepatitis C virus

**Table S2.** Age-adjusted multivariate logistic regression analyses of pathogenic risks of HBV/HCV-related HCC in a non-cirrhotic liver.

| Variables                               | Univariate Analysis |                | Multivariate Analysis |                |
|-----------------------------------------|---------------------|----------------|-----------------------|----------------|
|                                         | HR (95% CI)         | <i>p</i> value | HR (95% CI)           | <i>p</i> value |
| Sex (male vs. female)                   | 2.74 (1.47–5.10)    | 0.002          | 3.15 (1.56–6.36)      | 0.001          |
| BMI (kg/m <sup>2</sup> )                | 1.01 (0.94–1.08)    | 0.850          |                       |                |
| SMI (cm <sup>2</sup> /m <sup>2</sup> )  | 1.01 (0.98–1.04)    | 0.447          |                       |                |
| SATI (cm <sup>2</sup> /m <sup>2</sup> ) | 1.00 (0.99–1.01)    | 0.836          |                       |                |
| VATI (cm <sup>2</sup> /m <sup>2</sup> ) | 1.02 (1.01–1.03)    | <0.001         | 1.01 (1.00–1.03)      | 0.038          |
| Cancer stage (I/II/III/IV)              | 1.14 (0.89–1.46)    | 0.289          |                       |                |
| FPG (mg/dL)                             | 1.00 (0.99–1.01)    | 0.187          |                       |                |
| HOMA-IR                                 | 0.96 (0.87–1.06)    | 0.388          |                       |                |
| HbA1c (%)                               | 1.39 (1.11–1.76)    | 0.006          | 1.30 (1.01–1.67)      | 0.040          |
| TG (mg/dL)                              | 1.00 (1.00–1.01)    | 0.076          |                       |                |
| DM (yes vs. no)                         | 1.09 (0.64–1.87)    | 0.748          |                       |                |
| HL (yes vs. no)                         | 2.14 (0.62–7.41)    | 0.228          |                       |                |
| HTN (yes vs. no)                        | 2.42 (1.44–4.07)    | <0.001         | 2.06 (1.16–3.67)      | 0.014          |
| Etiology (HBV vs. HCV)                  | 3.17 (1.69–5.95)    | < 0.001        | 4.00 (2.02–7.94)      | < 0.001        |

HBV, hepatitis B virus; HCV, hepatitis C virus; HCC, hepatocellular carcinoma; HR, hazard ratio; CI, confidence interval; BMI, body mass index; SMI, skeletal muscle index; SATI, subcutaneous adipose tissue index; VATI, visceral adipose tissue index; FPG, fasting plasma glucose; HOMA-IR, homeostasis model assessment-insulin resistance; HbA1c, hemoglobin A1c; TG, triglyceride; DM, diabetes mellitus; HL, hyperlipidemia; HTN, hypertension.
